# Supplementary material for: Identification of Novel Multi-Omics Expression Landscapes and Meta-Analysis of Landscape-Based Competitive Endogenous RNA Networks in ALDH+ Lung Adenocarcinoma Stem Cells
Source: Biomed Res Int. 2022 Aug 31;2022:9545609. doi: 10.1155/2022/9545609 (PMC9453044; doi:10.1155/2022/9545609)
Supplement: Supplementary Materials — The supporting information includes the following: Figure S1. First base bias and position base bias of novel miRNAs; Table S1. Detailed information of miRNAs; Table S2. Novel lncRNAs; Table S3. Novel miRNAs; Table S4. Novel circRNAs; Table S5. Information on ceRNA-based molecular interactions and pairs. [file 9545609.f1.zip]

Archive with 6 entries (6 files):
- Figure S1 novel miRNAs-base bias.pdf
- Table_S1_Detailed information of miRNAs.doc
- Table_S2_Novel_lncRNAs.doc
- Table_S3_Novel_miRNAs.doc
- Table_S4_Novel_circRNAs.doc
- Table_S5_ceRNA_based molecular information and pairs information.doc
